# Supplementary material for: Prostate-specific IL-6 transgene autonomously induce prostate neoplasm through amplifying inflammation in the prostate and peri-prostatic adipose tissue
Source: PubMed Central journal article supplement (PMC5225646; doi:10.1186/s13045-016-0386-7), 2017-01-11
Supplement: 13045_2016_386_MOESM1_ESM.pdf [file 13045_2016_386_MOESM1_ESM.pdf]

**Figure S1**

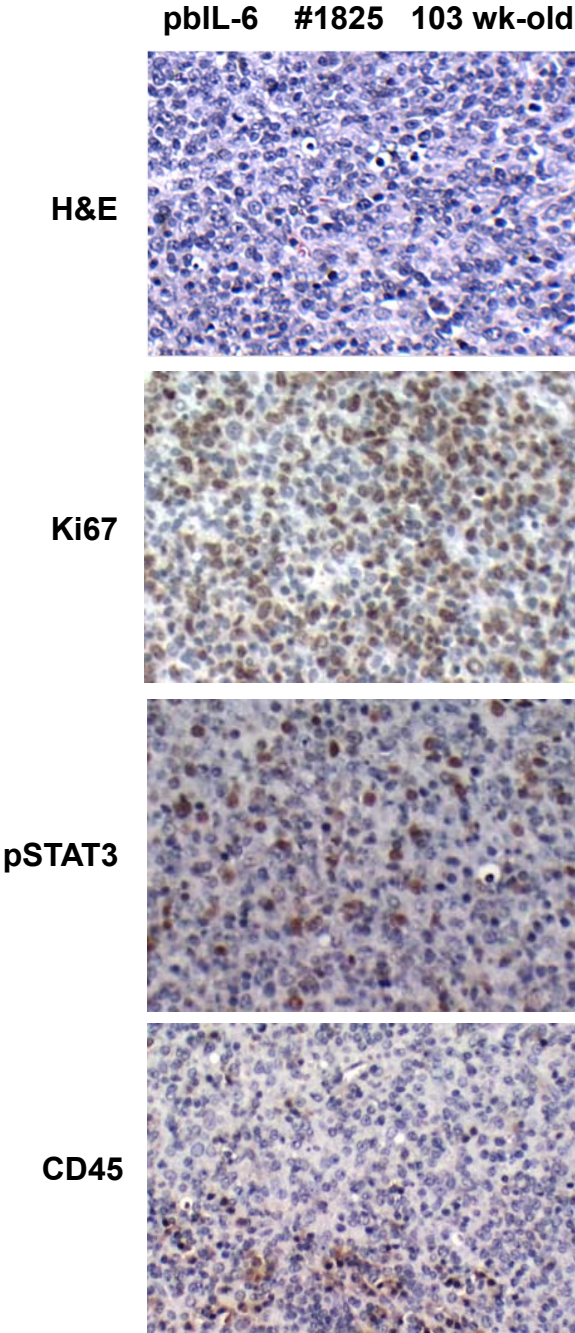

**Figure S1.** Representative histology of a 103 wk-old mouse (#1825) that development poorly differentiated tumor in the prostate. CD45 stains for all leukocyte antigens in the infiltrates.

## Figure S2

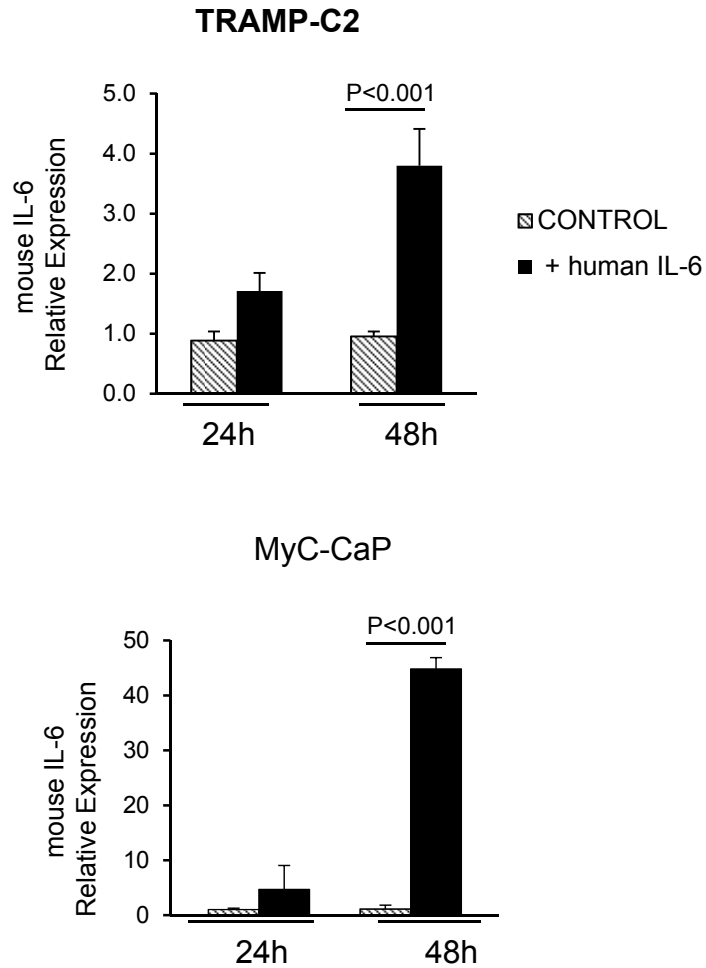

**Supplement Figure 2.** Exogenous human IL-6 induces paracrine mouse IL-6 Expression in two mouse prostate tumor cells lines, the TRAMP-C2 and MyC-Cap. 50 ng/ml of human IL-6 was supplemented in the culture media. Cells were harvested at 24 hr and 48 hr of culture. Relative mouse IL-6 expression was assessed by quantitative RT-PCR.

**Table S1. Function of the most significantly upregulated genes with more than Log2 fold changes in the Volcano plot**

| <b>Gene ID</b>        | <b>encoding protein</b>                                  | <b>function</b>                                       |
|-----------------------|----------------------------------------------------------|-------------------------------------------------------|
| <b>up-regulated</b>   |                                                          |                                                       |
| BCL3                  | B cell leukemia/lymphoma 3 protein                       | proto-oncogene, pro-survival and pro-inflammation     |
| C1R                   | Complement 1r                                            | complement system, pro-inflammation                   |
| CSGALNACT1            | Chondroitin Sulfate N-Acetylgalactosaminyltransferase 1  | pro-oncogenic, promote wnt/ $\beta$ -catenin pathway  |
| CXCL6                 | chemokine ligand 6                                       | pro-inflammation                                      |
| CYP1B1                | Cytochrome P450 1B1                                      | Steroid Metabolism and fat production                 |
| IER3                  | Immediate early response 3                               | regulates cycle progression and pro-ongogenic         |
| IL-27Ra               | Interleukin 27 receptor                                  | pro-inflammation                                      |
| IL-6                  | Interleukin 6                                            | Pro-inflammation                                      |
| LRG1                  | Leucine-rich $\alpha$ 2 glycoprotein 1                   | inflammatory protein, associated with malignancy      |
|                       | v-maf avian musculoaponeurotic fibrosarcoma oncogene     |                                                       |
| MAFF                  | homolog F                                                | Pro-oncogene, Transcriptional factor, stress response |
| NFKB1a                | Nuclear factor NF-kappa-B p105 subunit                   | Transcriptional factor, Pro-inflammation              |
| TGF- $\beta$ 1        | transforming growth factor beta superfamily of cytokines | pro-oncogenic and pro-inflammation                    |
| <b>down-regulated</b> |                                                          |                                                       |
| EDIL-3                | EGF-like repeats and Discoidin I-Like Domains 3          | Extracellular matrix, ligand for intergrins           |
| EMP2                  | Epithelial membrane protein-2                            | regulates angionenesis                                |
| NPTX1                 | neuronal pentraxin 1                                     | epigenetic regulator, methylation regulator           |

**Table S2. Upregulated inflammation-associated Genes in the prostate of pbIL-6 mice that are not highlighted on the Volcano Plot**

|              |                                                                           |
|--------------|---------------------------------------------------------------------------|
| C1S          | complement component 1, s subcomponent                                    |
| CASP1        | caspace 1, apoptosis-related cysteine peptidase                           |
| CASP10       | caspace 10, apoptosis-related cysteine peptidase                          |
| CASP4        | caspace 4, apoptosis-related cysteine peptidase                           |
| CFB          | complement factor B                                                       |
| CSF          | Colony stimulating factor 1 (macrophage)                                  |
| CTAGE1       | cutaneous T-cell lymphoma-associated antigen 1                            |
| CTSS         | cathepsin S                                                               |
| CTSZ         | cathepsin Z                                                               |
| CXCL1        | chemokine (C-X-C motif) ligand 1                                          |
| CXCL2        | chemokine (C-X-C motif) ligand 2                                          |
| CXCL3        | chemokine (C-X-C motif) ligand 3                                          |
| G0S2         | lymphocytes G0/G1switch 2                                                 |
| GCNT2        | glucosaminyl (N-acetyl) transferase 2, I-branching enzyme                 |
| ICAM1 (CD54) | intercellular adhesion molecule 1, binds to CD11a/CD18)                   |
| IFI16        | interferon, gamma-inducible protein 16                                    |
| IFI44L       | interferon-induced protein 44-like                                        |
| IL4R         | interleukin 4 receptor                                                    |
| IL7R         | interleukin 7 receptor                                                    |
| IL8          | interleukin 8                                                             |
| INHBA        | inhibin, beta A                                                           |
| ISG20        | interferon stimulated exonuclease gene 20kDa                              |
| ITGA2        | integrin, alpha 2 (CD49B, alpha 2 subunit of VLA-2 receptor)              |
| ITGB2 (CD18) | integrin, beta 2 (CD18)                                                   |
| KLF4         | Kruppel-like factor 4                                                     |
| NAIP         | NLR family, apoptosis inhibitory protein                                  |
| NFATC1       | nuclear factor of activated T-cells, cytoplasmic, calcineurin-dependent 1 |
| NLRP1        | NLR family, pyrin domain containing 1                                     |
| NNMT         | nicotinamide N-methyltransferase                                          |
| PTX3         | pentraxin-related gene, rapidly induced by IL-1 beta                      |
| PVRL3        | poliovirus receptor-related 3                                             |
| RFTN1        | raftlin, lipid raft linker 1                                              |
| S100A3       | S100 calcium binding protein A3                                           |
| S100A9       | S100 calcium binding protein A9                                           |
| SAA1         | serum amyloid A1                                                          |
| SAA2         | serum amyloid A2                                                          |
| SOCS3        | suppressor of cytokine signaling 3                                        |
| TLR2         | toll-like receptor 2                                                      |
| TNFAIP3      | tumor necrosis factor, alpha-induced protein 3                            |
| TRBV5-4      | T cell receptor beta variable 5-4                                         |
| VEGFC        | vascular endothelial growth factor C                                      |
| VNN1         | vanin 1                                                                   |

**Table S3. Upregulated oncogenic genes in the prostate of pbIL-6 mice that are not highlighted on the Volcano Plot**

|          |                                                      |
|----------|------------------------------------------------------|
| CASC5    | cancer susceptibility candidate 5                    |
| CCND1    | cyclin D1                                            |
| CDC2L1   | cell division cycle 2-like 1 (PITSLRE proteins)      |
| CDH2     | cadherin 2, type 1, N-cadherin (neuronal)            |
| COL16A1  | collagen, type XVI, alpha 1                          |
| CTNND1   | catenin (cadherin-associated protein), delta 1       |
| FOSL1    | FOS-like antigen 1                                   |
| IFNGR1   | interferon gamma receptor 1                          |
| IGF1     | insulin-like growth factor 1                         |
| JUN      | jun oncogene                                         |
| KLF4     | Kruppel-like factor 4                                |
| LCN2     | lipocalin 2                                          |
| MUC1     | mucin 1, cell surface associated                     |
| OSMR     | oncostatin M receptor                                |
| PBX2     | pre-B-cell leukemia homeobox 2                       |
| PMAIP1   | phorbol-12-myristate-13-acetate-induced protein 1    |
| RAB27B   | RAB27B, member RAS oncogene family                   |
| RABL4    | RAB, member of RAS oncogene family-like 4            |
| RASSF4   | Ras association (RalGDS/AF-6) domain family member 4 |
| RELB     | v-rel reticuloendotheliosis viral oncogene homolog B |
| RHEBL1   | Ras homolog enriched in brain like 1                 |
| SERPINB3 | serpin peptidase inhibitor, clade B, member 3        |
| SERPINB4 | serpin peptidase inhibitor, clade B, member 4        |
| SERPINB8 | serpin peptidase inhibitor, clade B, member 8        |
| SERPINE2 | serpin peptidase inhibitor, clade E, member 2        |
| TMPRSS2  | Androgen regulated transmembrane protease, serine 2  |

**Table S4. Upregulated metabolism-associated genes in the prostate of pbIL-6 mice that are not highlighted on the Volcano Plot**

|        |                                                                      |
|--------|----------------------------------------------------------------------|
| APOL1  | apolipoprotein L, 1                                                  |
| GPRC5B | G protein-coupled receptor, may be associated with insulin secretion |
| GLS    | glutaminase                                                          |
| KMO    | kynurenine 3-monooxygenase (kynurenine 3-hydroxylase)                |
| LOXL2  | lysyl oxidase-like 2                                                 |
| PLAT   | plasminogen activator, tissue                                        |
| SAT1   | spermidine/spermine N1-acetyltransferase 1                           |
| SCD    | stearoyl-CoA desaturase (delta-9-desaturase)                         |
| XAF1   | XIAP associated factor 1                                             |

**Table S5.** List of primers used for qRT-PCR.

| <b>Gene<br/>(mouse)</b> | <b>Forward</b>            | <b>Reverse</b>           |
|-------------------------|---------------------------|--------------------------|
| E-Cadherin              | CGAGAGAGTTACCCTACATA      | GTGTTGGGGGCATCATCATC     |
| N-cadherin              | AGCGCAGTCTTACCGAAGG       | TCGCTGCTTTCATACTGAACTTT  |
| Vimentin                | CGGCTGCGAGAGAAATTGC       | CCACTTCCGTTCAAGGTCAAG    |
| IGF-I                   | TCATGTCGTCTTCACACCTTCT    | CCACACACGAACTGAAGAGCAT   |
| IGF-II                  | ACAACCTTCGATTTGAACCACATTC | GAGAGCTCAAACCATGCAAACCT  |
| AR                      | TACTTTCCACCCCAGAAGACCTGC  | CATTTCCGAAGACGACAAGATGG  |
| mIL-6                   | CAAAGCCAGAGTCCTTCAGA      | GATGGTCTTGGTCCTTAGCC     |
| hIL-6                   | GAACCTCTTCTCCACAAGCG      | GAATCCAGAGATTGGAAGCATCC  |
| gp130                   | CCAGCAACGAGGAGAATGAGT     | TGTGCACCACAGTGGAGTACTG   |
| c-Fos                   | GACTTCTTGTTCCGGCATCA      | AGGTCCACATCTGGCACAGAG    |
| K-Ras                   | GCTCAGGAGTTAGCAAGGAG      | GTATTCACATAACTGTACACCTTG |
| GAPDH                   | GACAACCTTTGGCATTGTGG      | ATGCAGGGATGATGTTCTG      |
